# Supplementary material
Source: PubMed Central journal article supplement (PMC9514192)
Supplement: 705_2022_5612_MOESM5_ESM.pdf [file 705_2022_5612_MOESM5_ESM.pdf]

# Supplementary Figure S1

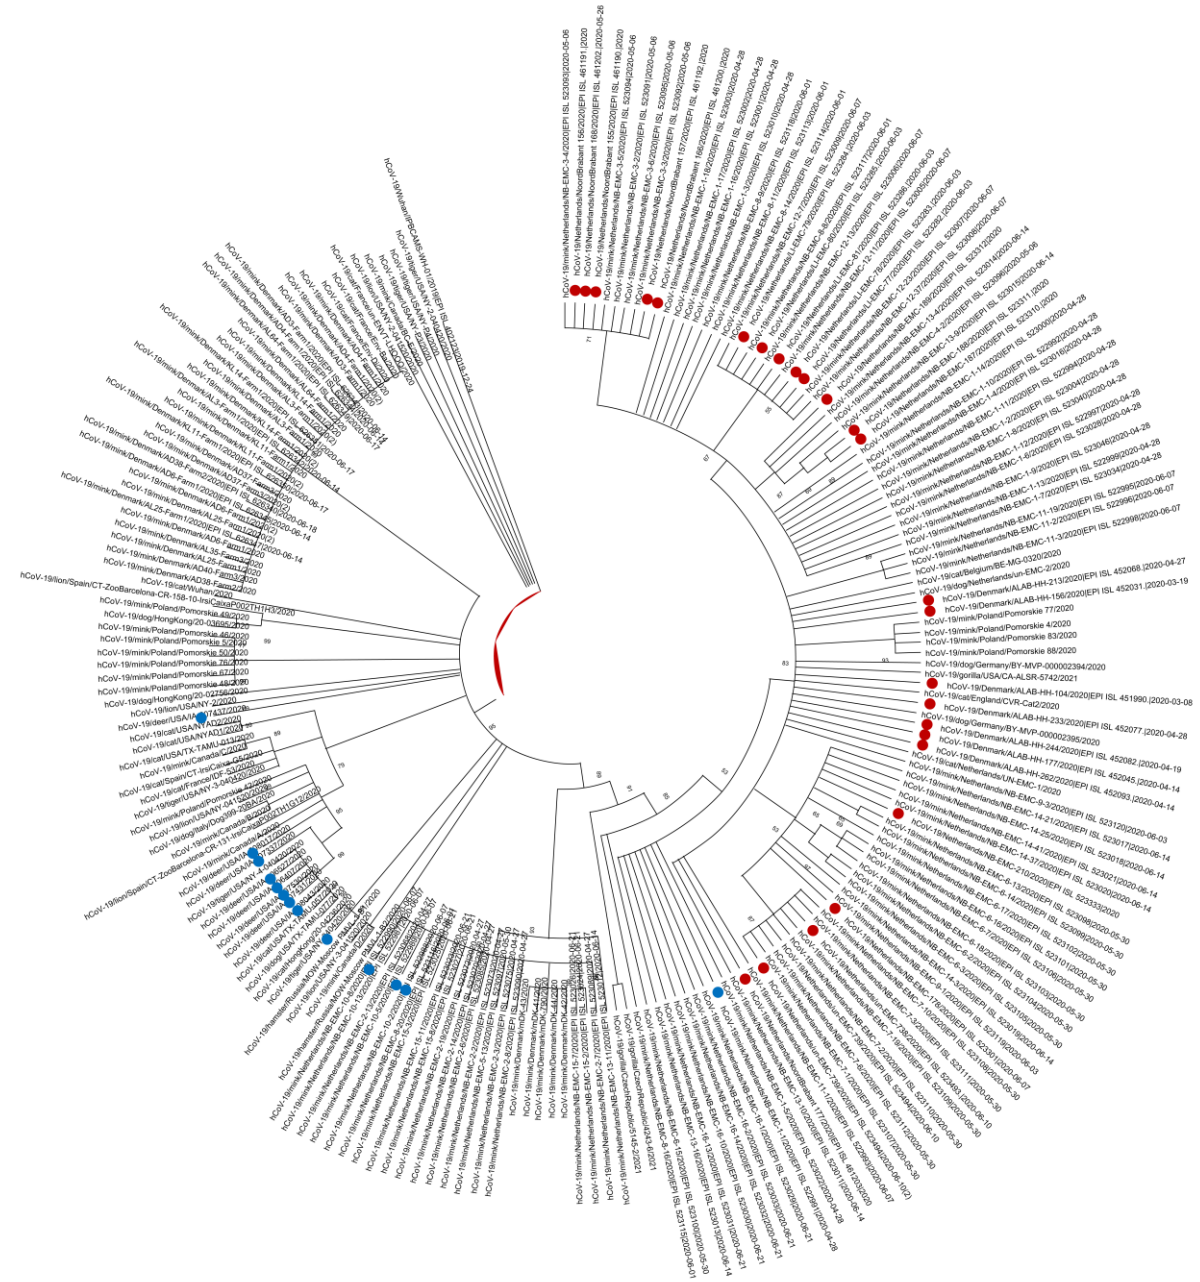

**Fig S1.** The phylogenetic tree of 258 sequences was analyzed by MEGA-X using the maximum likelihood method and Tamura-Nei model.

Supplementary Figure S2

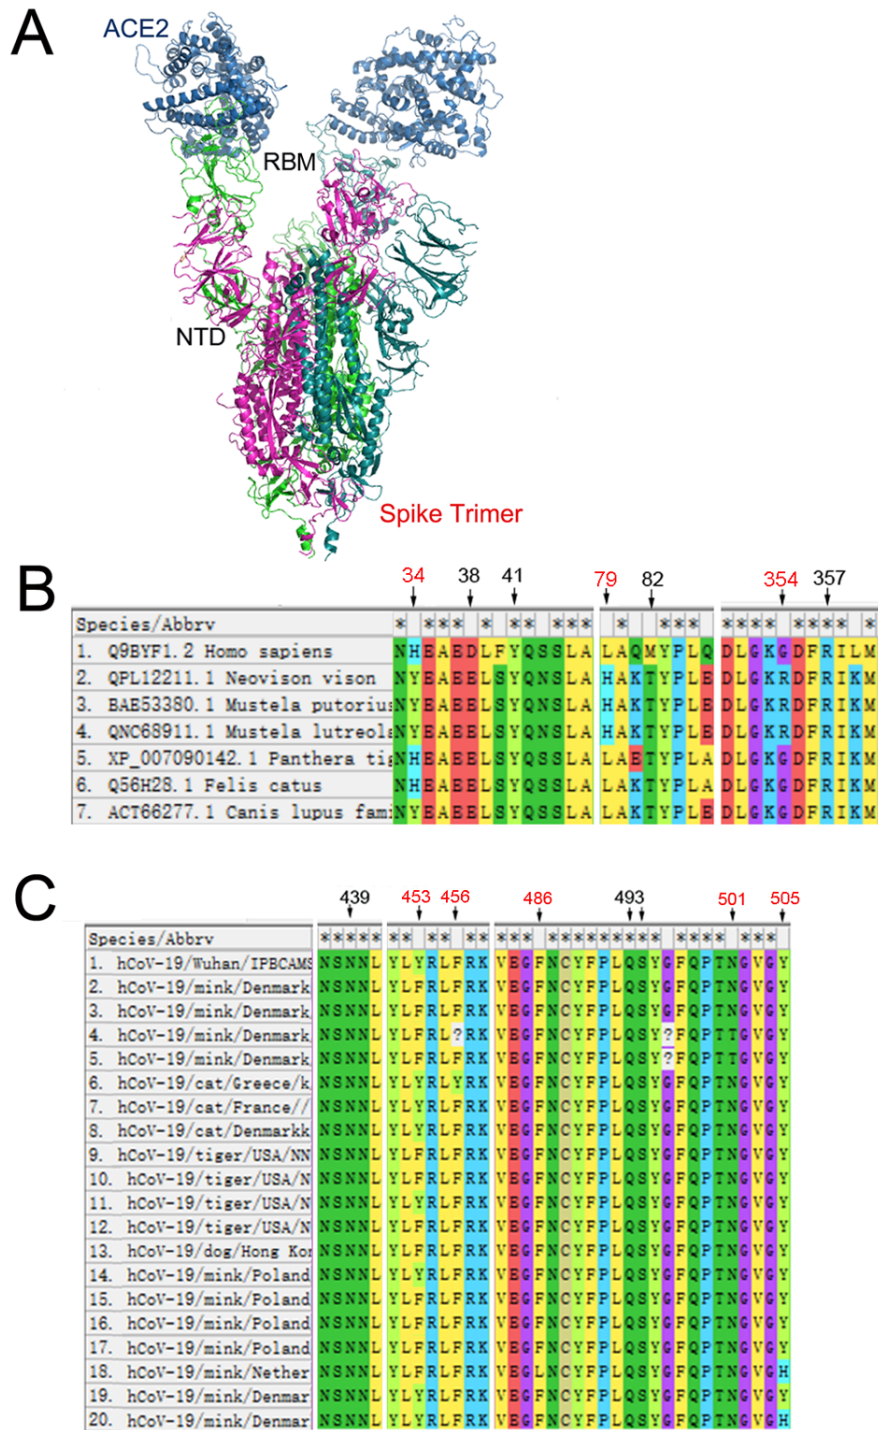

**Fig S2. Sequences analysis of SARS-CoV-2 spike and receptor ACE2.** (A) Receptor ACE2 interacting with the SARS-CoV-2 Spike. (B) Alignment of ACE2 of humans and animals. The positions of the amino acids (aa) that function in the spatial interaction are indicated by arrows. (C) Alignment of the SARS-CoV-2 RBD sequences in humans and in animals reported to have been infected. The residues in contact with ACE2 are indicated.
